# Supplementary material
Source: ML conference proceedings conference paper supplement (https://openreview.net/forum?id=GYomxff6HZ)
Supplement: supplementary_material [file attachment]

**Table 1: Summary statistics of processed datasets. "-" indicates there is no question information.**

|               | ASSIST09 | ASSIST12 | ASSIST15 | ASSIST17 | Statics2011 | EdNet     | Eedi    |
|---------------|----------|----------|----------|----------|-------------|-----------|---------|
| # Student     | 4,160    | 5,000    | 19,840   | 1,706    | 331         | 5,000     | 5,000   |
| # Question    | 15,680   | 36,056   | -        | 1,150    | 633         | 11,775    | 26,706  |
| # Concept     | 167      | 242      | 100      | 86       | 106         | 1,837     | 1,050   |
| # Interaction | 207,659  | 717,188  | 683,801  | 153,324  | 91,133      | 1,156,254 | 597,124 |
